# Supplementary material for: Incidence, Characteristics and Clinical Relevance of Acute Stroke in Old Patients Hospitalized With COVID-19
Source: Research Square preprint supplement (doi:10.21203/rs.3.rs-110348/v1), 2020-12-02
Supplement: Supplementary file 1 [file cfa03900578f3e29d529b706.docx]

**Supplemental Material**

**Incidence, characteristics and clinical relevance of acute stroke in old patients hospitalized with COVID-19**

Aline Mendes, MD1, François R. Herrmann MD, MPH1, Laurence Genton MD, PhD2, Christine Serratrice MD3, Emmanuel Carrera MD4, Maria Isabel Vargas MD5, Gabriel Gold MD1, Christophe E. Graf MD6, Dina Zekry MD, PhD3, Max Scheffler MD7

1 Division of Geriatrics, Department of Rehabilitation and Geriatrics, University Hospitals of Geneva and Faculty of Medicine, Geneva, Switzerland.

2 Unit of Clinical Nutrition, University Hospitals of Geneva and Faculty of Medicine, Geneva, Switzerland.

3 Division of Internal Medicine for the Aged, Department of Rehabilitation and Geriatrics, University Hospitals of Geneva and Faculty of Medicine, Geneva, Switzerland.

4 Division of Neurology, Department of Neurosciences, University Hospitals of Geneva and Faculty of Medicine, Geneva, Switzerland.

5 Division of Neuroradiology, Diagnostic Department, University Hospitals of Geneva and Faculty of Medicine, Geneva, Switzerland

6 Division of Internal Medicine and Rehabilitation, Department of Rehabilitation and Geriatrics, University Hospitals of Geneva and Faculty of Medicine, Geneva, Switzerland.

7Division of Radiology, Diagnostic Department, University Hospitals of Geneva, Geneva, Switzerland

**Supplemental Material**

**Supplementary Table S1.** Characteristics of acute ischemic stroke in COVID-19 patients

|  | **Large vessel occlusion** | **Infarct limited to the left side** | **Infarct limited to the right side** | **Bilateral infarcts** | **Middle cerebral artery territory** | **Anterior cerebral artery territory** | **Posterior cerebral artery territory** | **Vertebrobasilar territory** | **Multiple territories** | **Confluent white matter lesions** | **Lacunes** | **Microbleeds** |
| --- | --- | --- | --- | --- | --- | --- | --- | --- | --- | --- | --- | --- |
| Case 1 | X | X |  |  |  |  | X |  |  |  | X |  |
| Case 2 |  | X |  |  |  |  |  | X |  | X |  |  |
| Case 3 | X |  | X |  | X |  |  |  |  | X |  | X |
| Case 4 |  |  | X |  | X |  |  |  |  | X | X | X |
| Case 5 |  |  |  | X | X |  |  |  | X | X | X | X |
| Case 6 |  | X |  |  | X |  |  |  |  | X |  | X |
| Case 7 |  |  | X |  |  |  | X |  |  | X | X |  |
| Case 8 |  |  | X |  | X | X | X |  | X | X | X | X |
| Case 9 |  |  | X |  |  |  |  | X |  | X |  |  |

**Supplementary Table S2.** Detailed description of all stroke cases.

**Supplementary Figure S1.** Supplementary images of vascular neurologic complications in old and very old patients hospitalized with coronavirus disease 2019 infection. *A*, *B*, Computed tomography (CT) images of 86-year-old woman. *A*, Coronal reconstruction of CT angiography shows occlusion of left posterior cerebral artery at its origin (arrow). *B*, Noncontrast CT (NCCT) shows hypoattenuating parenchyma, loss of gray-white matter differentiation, and swelling of the left occipital lobe (arrows), consistent with acute ischemia. *C*, Diffusion-weighted imaging (DWI) magnetic resonance imaging (MRI) image of 89-year-old woman shows small hyperintensity in left capsulo-lenticular region (arrow), consistent with acute ischemia. *D*, DWI MRI image of 93-year old man shows small ischemic lesion in right cerebellum (arrow). *E*, T2-weighted image of the same patient shows lesion equally hyperintense and constituted (arrow). *F*, DWI MRI image of 88-year old woman shows small ischemic lesion next to left lateral ventricle (arrow). This acute constituted ischemic lesion has correlates on T2-weighted (*G*) and coronal fluid-attenuated inversion recovery (*H*) images (arrows). Note areas of significant hyperintense white matter changes in periventricular regions (*G*, asterisk), consistent with microvascular changes. *I*, NCCT image of 91-year-old man shows small cortical hypodensity in right parietal lobe (arrow), consistent with an acute ischemic lesion. Subcortical white matter hypoattenuation (*I*, asterisk) is suggestive of microvascular changes. *J*, Mean transit time color map of perfusion CT image of the same patient shows more extensive area of hypoperfusion in right centrum semiovale (arrows). *K*, Subsequently performed DWI MRI shows cortical ischemic lesion as a focal hypersignal (arrow). *L*, NCCT image of 81-year-old man shows hypodensity in right brainstem (arrow), related to acute ischemia. *M*, DWI MRI image of 78-year-old man shows small ischemic lesion in right corona radiata (arrow). *N*, NCCT image of 91-year-old man shows small hyperdense hemorrhagic focus (arrow) in right centrum semiovale. *O*, DWI MRI image of 88-year-old woman shows acute ischemic lesion in right occipital lobe (arrow) and right thalamus (arrowhead). The lesions are visible as hypersignals on the corresponding T2-weighted image (*P*, arrow and arrowhead).
